# Supplementary material for: Discovery and identification of the prognostic significance and potential mechanism of FMO2 in breast cancer
Source: publisher site journal article supplement (doi:10.18632/aging.205204), 2023-11-13
Supplement: Supplementary file [file aging-v15i21-205204-supplementary-material-SD2.pdf]

## SUPPLEMENTARY TABLES

Supplementary Table 1. Relationship between FMO2 and clinical parameters of breast cancer.

| Variables                            | TCGA           |                                   |          | SCAN-B         |                                   |          |
|--------------------------------------|----------------|-----------------------------------|----------|----------------|-----------------------------------|----------|
|                                      | Patient number | FMO2 log2 standardized expression | P        | Patient number | FMO2 log2 standardized expression | P        |
| <b>Nature of the tissue</b>          |                |                                   | < 0.0001 |                |                                   |          |
| Healthy                              | 92             | 6.8560/ 0.7884                    |          |                |                                   |          |
| Tumor-adjacent                       | 89             | 6.5792/ 0.7530                    |          |                |                                   |          |
| Tumor                                | 743            | 2.8594/ 1.5755                    |          |                |                                   |          |
| <b>ER status</b>                     |                |                                   | < 0.0001 |                |                                   | < 0.0001 |
| ER+                                  | 530            | 0.6034/1.7245                     |          | 3155           | -0.0411/0.9834                    |          |
| ER-                                  | 187            | 1.3099/1.9443                     |          | 323            | 0.2857/1.0738                     |          |
| <b>PR status</b>                     |                |                                   | 0.0106   |                |                                   | 0.0006   |
| PR+                                  | 470            | 0.6576/1.7180                     |          | 2842           | -0.0337/0.9786                    |          |
| PR-                                  | 243            | 1.0391/1.9598                     |          | 503            | 0.1435/1.0771                     |          |
| <b>ER and PR status combinations</b> |                |                                   | 0.0002   |                |                                   | < 0.0001 |
| ER+/PR+                              | 456            | 0.6589/1.7154                     |          | 2806           | -0.0382/0.9787                    |          |
| ER+/PR-                              | 71             | 0.2465/1.7630                     |          | 212            | -0.0454/1.0285                    |          |
| ER-/PR+                              | 14             | 0.6162/1.8678                     |          | 31             | 0.2993/0.9009                     |          |
| ER-/PR-                              | 171            | 1.3649/1.9536                     |          | 291            | 0.2812/1.0924                     |          |
| <b>HER2 status</b>                   |                |                                   | < 0.0001 |                |                                   | < 0.0001 |
| HER2-                                | 396            | 1.0139/1.7922                     |          | 3050           | 0.0203/1.0122                     |          |
| HER2+                                | 109            | 0.2601/1.6170                     |          | 506            | -0.1702/0.9061                    |          |
| <b>Histological types</b>            |                |                                   | < 0.0001 |                |                                   |          |
| IDC                                  | 549            | 0.6718/1.7653                     |          |                |                                   |          |
| ILC                                  | 116            | 1.6604/1.5374                     |          |                |                                   |          |
| IDC & ILC                            | 23             | 1.0332/1.7440                     |          |                |                                   |          |
| Mucinous                             | 13             | 0.8664/1.5635                     |          |                |                                   |          |
| <b>Pathological tumor stage</b>      |                |                                   | 0.0067   |                |                                   |          |
| I                                    | 145            | 0.9529/1.7012                     |          |                |                                   |          |
| II                                   | 440            | 0.6213/1.8253                     |          |                |                                   |          |
| III                                  | 152            | 2.5408/1.8054                     |          |                |                                   |          |
| <b>Age status</b>                    |                |                                   | 0.0005   |                |                                   | 0.0004   |
| ≤ 51 years old                       | 267            | 1.0975/1.8517                     |          | 754            | 0.1071/0.9819                     |          |
| > 51 years old                       | 476            | 0.6083/1.7544                     |          | 2519           | -0.0390/1.0031                    |          |
| <b>PAM50 subtypes</b>                |                |                                   | < 0.0001 |                |                                   | < 0.0001 |
| Basal-like                           | 136            | 1.6678/1.9598                     |          | 616            | 0.3294/1.0238                     |          |
| HER2-E                               | 51             | 0.2343/1.5514                     |          | 581            | -0.3446/0.7821                    |          |
| Luminal A                            | 268            | 1.3893/1.5733                     |          | 1088           | 0.0291/0.8487                     |          |
| Luminal B                            | 281            | -0.1737/1.4615                    |          | 825            | -0.6875/0.8235                    |          |
| Normal breast-like                   | 0              |                                   |          | 539            | 0.9795/0.7175                     |          |
| <b>Basal-like (PAM50)</b>            |                |                                   | < 0.0001 |                |                                   | < 0.0001 |
| Non-basal-like                       | 605            | 0.5807/1.7072                     |          | 3033           | -0.0685/0.9841                    |          |
| Basal-like                           | 136            | 1.6678/1.9598                     |          | 616            | 0.3294/1.0238                     |          |
| <b>Triple-negative breast cancer</b> |                |                                   | < 0.0001 |                |                                   | < 0.0001 |
| Non-TNBC                             | 578            | 0.5983/1.7324                     |          | 3309           | -0.0392/0.9805                    |          |
| TNBC                                 | 87             | 1.6091/1.9075                     |          | 206            | 0.3626/1.1298                     |          |
| <b>TNBC &amp; Basal-like (PAM50)</b> |                |                                   | < 0.0001 |                |                                   | < 0.0001 |
| Non-basal-like & non-TNBC            | 552            | 0.5724/1.7088                     |          | 2951           | -0.0759/0.9824                    |          |
| Basal-like & TNBC                    | 71             | 1.7482/1.9278                     |          | 170            | 0.3937/1.1218                     |          |
| <b>Ki67 status</b>                   |                |                                   |          |                |                                   | < 0.0001 |
| Ki67-low                             |                |                                   |          | 798            | 0.2500/0.9643                     |          |
| Ki67-high                            |                |                                   |          | 1157           | -0.1350/1.0077                    |          |

|                                        |      |                |          |
|----------------------------------------|------|----------------|----------|
| Scarff Bloom & Richardson grade status |      |                | < 0.0001 |
| SBR1                                   | 544  | 0.3039/0.9245  |          |
| SBR2                                   | 1699 | 0.0600/0.9757  |          |
| SBR3                                   | 1374 | -0.2030/1.0229 |          |
| Nottingham Prognostic Index status     |      |                | < 0.0001 |
| NPI1                                   | 1173 | 0.1569/0.9412  |          |
| NPI2                                   | 1525 | -0.0777/1.0473 |          |
| NPI3                                   | 416  | -0.2154/0.9407 |          |

**Supplementary Table 2. The top 10 correlation genes with FMO2 in breast cancer.**

| Gene chip data                  |                                   |          |                |                                 |                                   |          |                |
|---------------------------------|-----------------------------------|----------|----------------|---------------------------------|-----------------------------------|----------|----------------|
| Positive correlations with FMO2 |                                   |          |                | Negative correlations with FMO2 |                                   |          |                |
| Gene symbol                     | Pearson's correlation coefficient | P        | Patient number | Gene symbol                     | Pearson's correlation coefficient | P        | Patient number |
| SFRP1                           | 0.556                             | < 0.0001 | 8245           | FAM136BP                        | -0.5519                           | < 0.0001 | 53             |
| SAA2-SAA4                       | 0.542                             | < 0.0001 | 481            | COX7BP1                         | -0.4607                           | 2.00E-04 | 59             |
| KRT16P6                         | 0.5272                            | < 0.0001 | 381            | SNORD66                         | -0.4563                           | 6.00E-04 | 53             |
| LINC02613                       | 0.5268                            | < 0.0001 | 381            | SNORA2C                         | -0.4551                           | 6.00E-04 | 53             |
| KRT17P1                         | 0.512                             | < 0.0001 | 381            | SNORD99                         | -0.454                            | 6.00E-04 | 53             |
| CHL1-AS2                        | 0.5093                            | < 0.0001 | 381            | DHX40P1                         | -0.4536                           | 6.00E-04 | 53             |
| KRT16P2                         | 0.5071                            | < 0.0001 | 564            | COMMD3-BMI1                     | -0.4369                           | < 0.0001 | 100            |
| CRYAB                           | 0.5059                            | < 0.0001 | 8245           | FAM138B                         | -0.4124                           | < 0.0001 | 171            |
| SPECC1L-ADORA2A                 | 0.5045                            | < 0.0001 | 139            | SNORD3A                         | -0.407                            | 0.0025   | 53             |
| CHRDL1                          | 0.503                             | < 0.0001 | 7950           | ELOCP2                          | -0.4039                           | < 0.0001 | 100            |
| RNA-sequence data               |                                   |          |                |                                 |                                   |          |                |
| Positive correlations with FMO2 |                                   |          |                | Negative correlations with FMO2 |                                   |          |                |
| Gene symbol                     | Pearson's correlation coefficient | P        | Patient number | Gene symbol                     | Pearson's correlation coefficient | P        | Patient number |
| CHRDL1                          | 0.6938                            | < 0.0001 | 4421           | PAFAH1B3                        | -0.4036                           | < 0.0001 | 4421           |
| SFRP1                           | 0.6843                            | < 0.0001 | 4421           |                                 |                                   |          |                |
| IL33                            | 0.6767                            | < 0.0001 | 4421           |                                 |                                   |          |                |
| TSHZ2                           | 0.6742                            | < 0.0001 | 4421           |                                 |                                   |          |                |
| FREM1                           | 0.6739                            | < 0.0001 | 4421           |                                 |                                   |          |                |
| ABCA6                           | 0.6692                            | < 0.0001 | 4421           |                                 |                                   |          |                |
| BOC                             | 0.6672                            | < 0.0001 | 4421           |                                 |                                   |          |                |
| LINC01140                       | 0.6619                            | < 0.0001 | 4016           |                                 |                                   |          |                |
| ABCA8                           | 0.6614                            | < 0.0001 | 4421           |                                 |                                   |          |                |
| ABCA9                           | 0.6588                            | < 0.0001 | 4421           |                                 |                                   |          |                |
